# Supplementary material
Source: publisher figshare collection journal article supplement (https://frontiersin.figshare.com/ndownloader/files/34495022)
Supplement: Supplementary file [file 34495022]

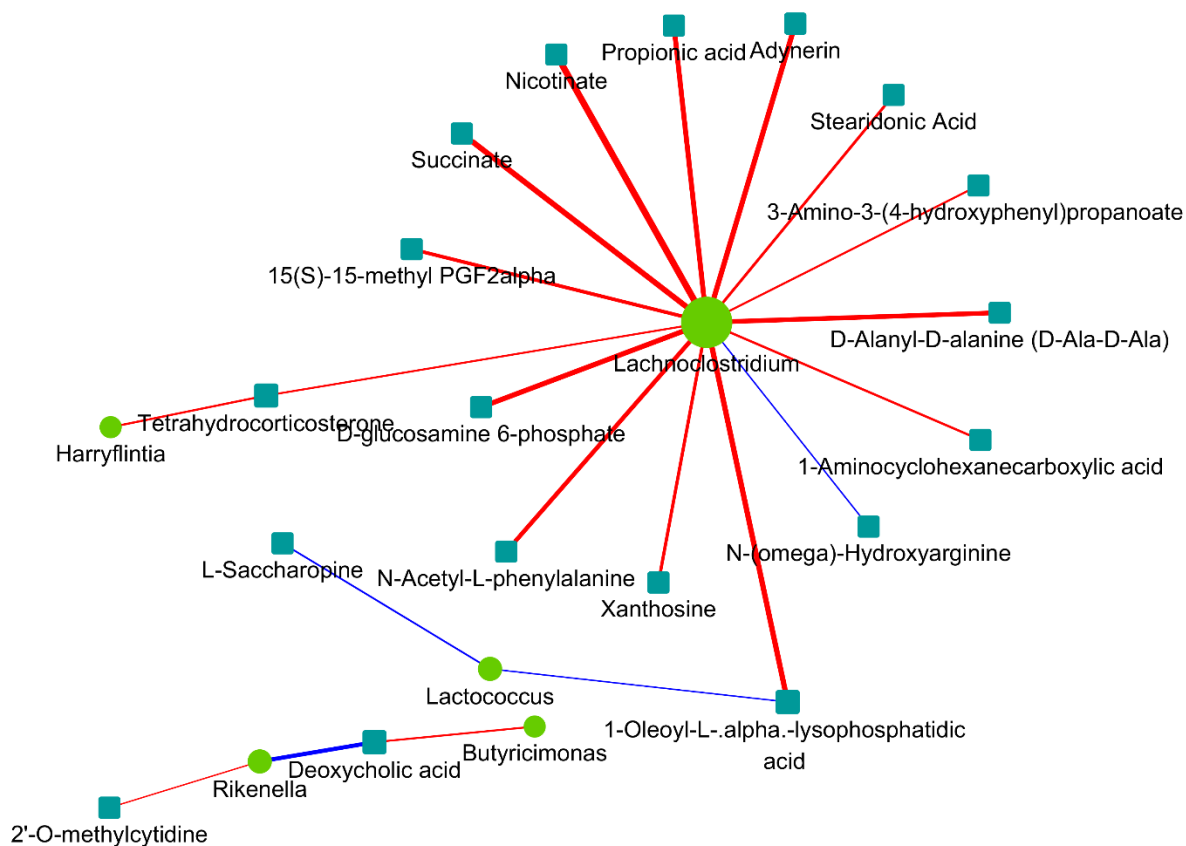

**Figure S4.** Spearman correlation analysis-based network of the significant differential GM and fecal metabolites in Sham and OVX groups. Only the GM and fecal metabolites with an absolute value of correlation coefficient within [0.5, 1] and  $p$ -value  $< 0.05$  were listed.
